# Supplementary material for: Biotransformation of Deoxynivalenol by a Dual-Member Bacterial Consortium Isolated from Tenebrio molitor Larval Feces
Source: MDPI journal article supplement (doi:10.3390/toxins15080492), 2023-08-04
Supplement: s1 [file s1]

# Supplementary Materials: Biotransformation of Deoxynivalenol by a Dual-Member Bacterial Consortium Isolated from *Tenebrio molitor* Larval Feces

Yang Wang, Donglei Zhao, Wei Zhang, Songxue Wang, Kai Huang, Baoyuan Guo

**Table S1.** The genomic ANIm analysis of *Devosia* sp. SD17-2 against the top 25 most closely related type strain in the genus of *Devosia*

| Genome                                        | ANIm [%] | Aligned [%] | Aligned [bp] | Total [bp] |
|-----------------------------------------------|----------|-------------|--------------|------------|
| <i>Devosia equisanguinis</i> CIP 111628 [T]   | 84.52    | 23.89       | 1010636      | 4231113    |
| <i>Devosia sediminis</i> MSA67 [T]            | 84.48    | 22.39       | 947407       | 4231113    |
| <i>Devosia riboflavina</i> IFO13584 [T]       | 84.40    | 25.15       | 1064115      | 4231113    |
| <i>Devosia lucknowensis</i> L15 [T]           | 84.38    | 18.17       | 768916       | 4231113    |
| <i>Devosia salina</i> SCS-3 [T]               | 84.38    | 21.97       | 929724       | 4231113    |
| <i>Devosia faecipullorum</i> CC-YST696 [T]    | 84.19    | 18.84       | 797347       | 4231113    |
| <i>Devosia soli</i> GH2-10 [T]                | 84.18    | 20.39       | 862514       | 4231113    |
| <i>Devosia chinhatensis</i> IPL18 [T]         | 84.16    | 18.54       | 784561       | 4231113    |
| <i>Devosia ureilytica</i> XJ19-45 [T]         | 84.02    | 18.66       | 789556       | 4231113    |
| <i>Devosia rhizoryzae</i> LEGU1 [T]           | 84.02    | 16.94       | 716714       | 4231113    |
| <i>Devosia oryzisoli</i> PTR5 [T]             | 83.91    | 14.70       | 621975       | 4231113    |
| <i>Devosia ginsengisoli</i> Gsoil 520 [T]     | 83.91    | 19.85       | 839792       | 4231113    |
| <i>Devosia aurantiaca</i> H239 [T]            | 83.85    | 17.36       | 734430       | 4231113    |
| <i>Devosia limi</i> DSM 17137 [T]             | 83.85    | 15.75       | 666210       | 4231113    |
| <i>Devosia marina</i> L53-10-65 [T]           | 83.84    | 17.30       | 732099       | 4231113    |
| <i>Devosia limi</i> DSM 17137 [T]             | 83.82    | 15.47       | 654724       | 4231113    |
| <i>Devosia epidermidihirudinis</i> E84 [T]    | 83.78    | 13.90       | 588292       | 4231113    |
| <i>Devosia subaequoris</i> HST3-14 [T]        | 83.72    | 16.29       | 689360       | 4231113    |
| <i>Devosia subaequoris</i> DSM 23447 [T]      | 83.71    | 16.37       | 692686       | 4231113    |
| <i>Devosia oryziradicis</i> G19 [T]           | 83.71    | 14.87       | 629234       | 4231113    |
| <i>Devosia naphthalenivorans</i> CM5-1 [T]    | 83.65    | 13.83       | 584972       | 4231113    |
| <i>Devosia yakushimensis</i> NBRC 103855 [T]  | 83.61    | 17.27       | 730724       | 4231113    |
| <i>Devosia psychrophila</i> Cr7-05 [T]        | 83.56    | 15.02       | 635504       | 4231113    |
| <i>Devosia beringensis</i> S02 [T]            | 83.53    | 17.13       | 724836       | 4231113    |
| <i>Devosia psychrophila</i> CGMCC 1.10210 [T] | 83.52    | 14.94       | 632057       | 4231113    |

Note: The "T" in square brackets represents the type strain.

**Table S2.** The genomic ANIm analysis of *Pseudomonas* sp. SD17-1 against the top 25 most closely related type strain in the genus of *Pseudomonas*

| Genome                                             | ANIm [%] | Aligned [%] | Aligned [bp] | Total [bp] |
|----------------------------------------------------|----------|-------------|--------------|------------|
| <i>Pseudomonas qingdaonensis</i> JJ3 [T]           | 99.33    | 93.00       | 5326121      | 5727087    |
| <i>Pseudomonas palmensis</i> BBB001 [T]            | 99.29    | 94.04       | 5385877      | 5727087    |
| <i>Pseudomonas aegrilactucae</i> MAFF 301350 [T]   | 89.43    | 73.08       | 4185072      | 5727087    |
| <i>Pseudomonas brassicae</i> MAFF 212427 [T]       | 89.38    | 68.28       | 3910236      | 5727087    |
| <i>Pseudomonas faucium</i> BML-PP048 [T]           | 86.11    | 47.54       | 2722377      | 5727087    |
| <i>Pseudomonas muyukensis</i> COW39 [T]            | 86.11    | 47.24       | 2705675      | 5727087    |
| <i>Pseudomonas peradeniyensis</i> BW13M1 [T]       | 86.09    | 47.93       | 2745252      | 5727087    |
| <i>Pseudomonas parasichuanensis</i> BML-PP020 [T]  | 86.00    | 47.76       | 2735266      | 5727087    |
| <i>Pseudomonas sichuanensis</i> WCHPs060039 [T]    | 85.98    | 47.14       | 2699896      | 5727087    |
| <i>Pseudomonas fakonensis</i> COW40 [T]            | 85.98    | 46.90       | 2685844      | 5727087    |
| <i>Pseudomonas xantholysinigenes</i> RW9S1A [T]    | 85.97    | 45.96       | 2632070      | 5727087    |
| <i>Pseudomonas oryziphila</i> 1257 [T]             | 85.94    | 46.93       | 2687613      | 5727087    |
| <i>Pseudomonas xanthosomae</i> COR54 [T]           | 85.93    | 47.14       | 2699621      | 5727087    |
| <i>Pseudomonas mosselii</i> DSM 17497 [T]          | 85.93    | 47.20       | 2703421      | 5727087    |
| <i>Pseudomonas maumuensis</i> COW77 [T]            | 85.88    | 45.93       | 2630725      | 5727087    |
| <i>Pseudomonas asiatica</i> RYU5 [T]               | 85.86    | 43.95       | 2517026      | 5727087    |
| <i>Pseudomonas entomophila</i> L48 [T]             | 85.85    | 46.57       | 2667022      | 5727087    |
| <i>Pseudomonas shirazica</i> VM14 [T]              | 85.85    | 44.06       | 2523229      | 5727087    |
| <i>Pseudomonas plecoglossicida</i> NBRC 103162 [T] | 85.83    | 41.76       | 2391786      | 5727087    |
| <i>Pseudomonas anuradhasurensis</i> RD8MR3 [T]     | 85.83    | 42.90       | 2457160      | 5727087    |
| <i>Pseudomonas inefficax</i> JV551A3 [T]           | 85.83    | 43.99       | 2519466      | 5727087    |
| <i>Pseudomonas soli</i> LMG 27941 [T]              | 85.70    | 45.25       | 2591353      | 5727087    |
| <i>Pseudomonas capeferrum</i> WCS358 [T]           | 85.68    | 43.58       | 2495918      | 5727087    |
| <i>Pseudomonas vlassakiae</i> RW4S2 [T]            | 85.63    | 42.44       | 2430699      | 5727087    |
| <i>Pseudomonas urethralis</i> BML-PP042 [T]        | 85.62    | 43.15       | 2471461      | 5727087    |

Note: The "T" in square brackets represents the type strain.

**Table S3.** Several putative PQQ-dependent dehydrogenases in *Pseudomonas* sp. SD17-1

| Name of subject enzyme | E value | Identities with mature DepA (%) | Coverage (%) | Accession number | Proenzyme (aas) | Signal peptide | Family                                                                                      |
|------------------------|---------|---------------------------------|--------------|------------------|-----------------|----------------|---------------------------------------------------------------------------------------------|
| ADH1                   | 3E-51   | 28                              | 26.3         | WEJ19651.1       | 697             | 1–18           | PQQ_like domain of the quinohemoprotein alcohol dehydrogenase (type II), cd10279 PQQ-ADH II |
| ADH2                   | 7E-44   | 27                              | 25.6         | WEJ19787.1       | 690             | 1–22           | PQQ_like domain of the quinohemoprotein alcohol dehydrogenase (type II), cd10279 PQQ-ADH II |
| ADH3                   | 1E-09   | 26                              | 15.0         | WEJ19927.1       | 808             | No             | Membrane-bound PQQ-dependent glucose dehydrogenase, cd10280 PQQ_mGDH                        |
| ADH4                   | 8E-51   | 29                              | 26.9         | WEJ19989.1       | 718             | 1–29           | PQQ_like domain of the quinohemoprotein alcohol dehydrogenase (type II), cd10279 PQQ-ADH II |
| ADH5                   | 4E-08   | 50                              | 5.7          | WEJ20631.1       | 806             | No             | Membrane-bound PQQ-dependent glucose dehydrogenase, cd10280 PQQ_mGDH                        |
| ADH6                   | 7E-15   | 23                              | 24.5         | WEJ21343.1       | 786             | No             | Membrane-bound PQQ-dependent glucose dehydrogenase, cd10280 PQQ_mGDH                        |
| ADH7                   | 1E-07   | 40                              | 6.4          | WEJ24222.1       | 811             | No             | Membrane-bound PQQ-dependent glucose dehydrogenase, cd10280 PQQ_mGDH                        |

**Table S4.** Primer sequence and PCR reaction program

| Candidate genes | Forward primer (5'-3')                                 | Reverse primer (5'-3')                   | Thermocycling conditions                                      |
|-----------------|--------------------------------------------------------|------------------------------------------|---------------------------------------------------------------|
| 17DH1           | AGGAGATATACCATGCAGTC<br>GGACCTTCTGGAGAACA              | GTGGTGGTGGTGGTGCTTCTG<br>CGGAAGGGCGAAG   | 98°C/2 min; 30×(98°C/10s, 63°C/30s,<br>72°C/1min); 72°C/4min  |
| 17DH2           | AGGAGATATACCATGCAGTC<br>GGATCTGCTGGAGAACA              | GTGGTGGTGGTGGTGCTTCTG<br>CGGCAGGGCG      | 98°C/2 min; 30×(98°C/10s, 63°C/30s,<br>72°C/1min); 72°C/4min  |
| 17DH3           | AGGAGATATACCATGCAGG<br>GCGTCCGCGAAA                    | GTGGTGGTGGTGGTGCTGCTT<br>GGGCAGCTTGAAGAC | 98°C/2 min; 30×(98°C/10s, 63°C/30s,<br>72°C/1min); 72°C/4min  |
| 17DH4           | AGGAGATATACCATGCAGG<br>AAAACCCCATCGACAGC               | GTGGTGGTGGTGGTGCTTAGC<br>GTCGGGCAGTG     | 98°C/2 min; 30×(98°C/10s, 63°C/30s,<br>72°C/1min); 72°C/4min  |
| Vector          | CATGGTATATCTCCTTCTTA<br>AAGTTAAACAAAATTATTT<br>CTAGAGG | CACCACCACCACCACCACT                      | 98°C/4 min; 30×(98°C/30s, 68°C/30s,<br>72°C/2min); 72°C/10min |

Note: The italicized bases in the primer sequence indicate homology to the expression vector sequence.

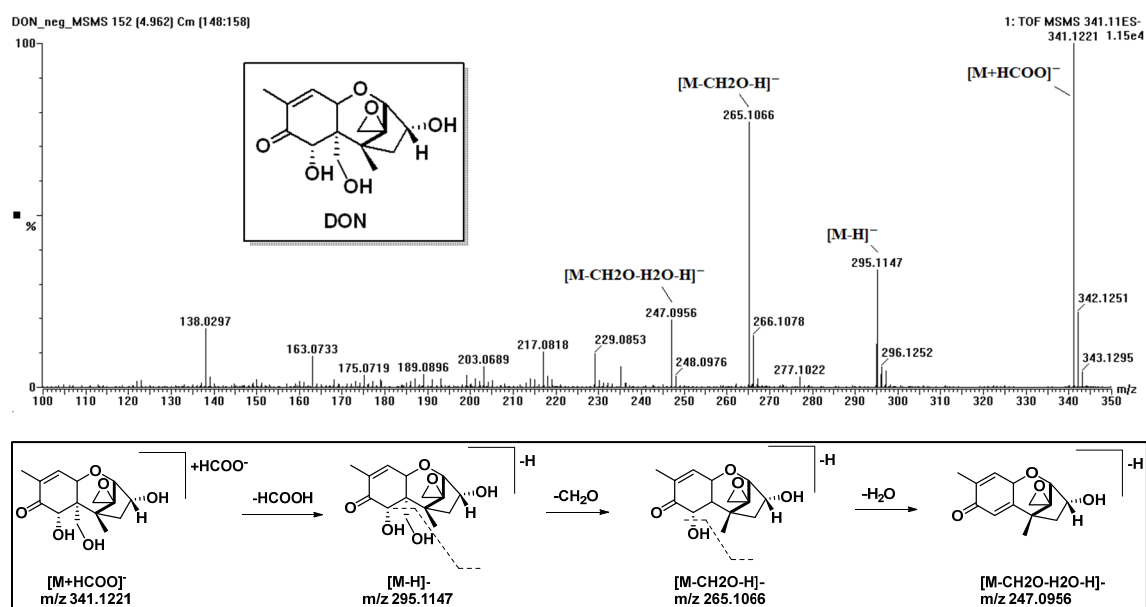

**Figure S1.** The proposed product ions in the fragmentation of m/z 341.1221 ([M+HCOO]<sup>-</sup>) for DON.

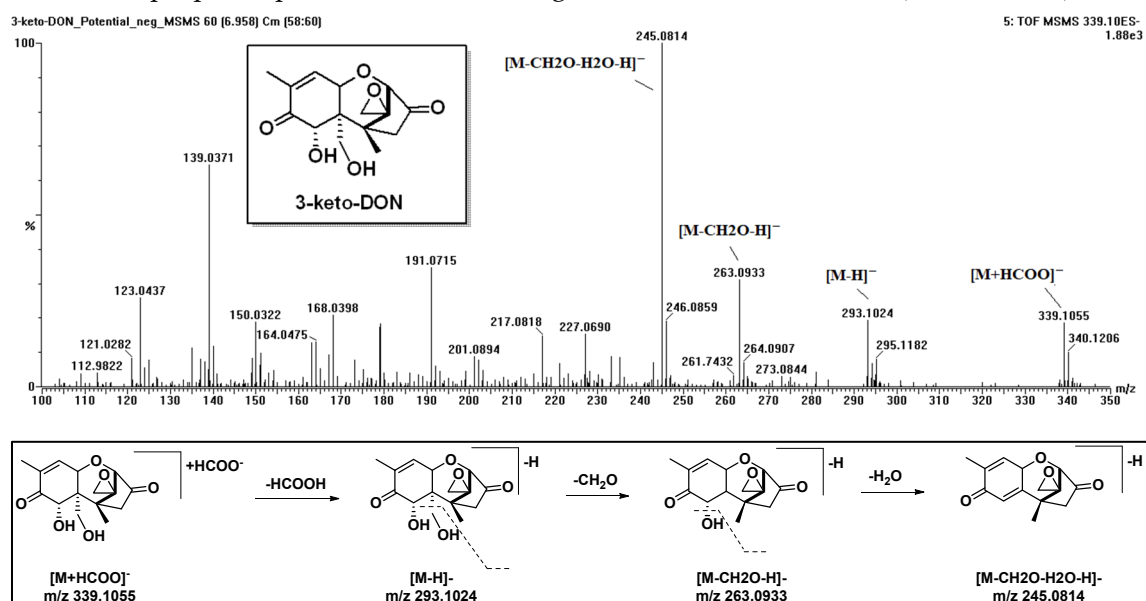

**Figure S2.** The proposed product ions in the fragmentation of m/z 339.1055 ([M+HCOO]<sup>-</sup>) for metabolite.
